# Supplementary material for: Two ruthenium complexes capable of storing multiple electrons on a single ligand – photophysical, photochemical and electrochemical properties of [Ru(phen)2(TAPHAT)]2+ and [Ru(phen)2(TAPHAT)Ru(phen)2]4+
Source: Royal Society of Chemistry journal article supplement (doi:10.1039/c7dt03232c), 2017-01-01
Supplement: c7dt03232c1.pdf [file c7dt03232c1.pdf]

## **:Two Ruthenium Complexes Capable of Storing Multiple Electrons on a Single Ligand - Photophysical, Photochemical and Electrochemical properties of $[\text{Ru}(\text{phen})_2(\text{TAPHAT})]^{2+}$ and $[\text{Ru}(\text{phen})_2(\text{TAPHAT})\text{Ru}(\text{phen})_2]^{4+}$ .**

Ludovic Troian-Gautier,<sup>†##</sup> Lionel Marcédis,<sup>§</sup> Julien De Winter,<sup>‡</sup> Pascal Gerbaux<sup>‡</sup> and Cécile Moucheron<sup>†\*</sup>

<sup>†</sup> Organic Chemistry and Photochemistry, Université libre de Bruxelles (U.L.B.), 50 Av. F.D. Roosevelt, CP 160/08, B-1050 Bruxelles, Belgium.

<sup>§</sup> Engineering of Molecular NanoSystems, Université libre de Bruxelles (U.L.B.), 50 Av. F.D. Roosevelt, CP 165/64, B-1050 Bruxelles, Belgium.

<sup>‡</sup> Organic Synthesis and Mass Spectrometry Laboratory, Center of Innovation and Research in Materials and Polymers, Research Institute for Science and Engineering of Materials, University of Mons - UMONS, 23 Place du Parc, B-7000 Mons, Belgium.

\* Email: [ludovic@live.unc.edu](mailto:ludovic@live.unc.edu), [cmouche@ulb.ac.be](mailto:cmouche@ulb.ac.be)

### **Present Address**

# Department of Chemistry - Murray Hall, University of North Carolina at Chapel Hill, 123 South Road, Chapel Hill, NC 27599, USA.

### Table of contents

|                                 |    |
|---------------------------------|----|
| Structures of ligands.....      | 2  |
| Mass spectrometry.....          | 3  |
| NMR spectroscopy .....          | 7  |
| Photostability measurement..... | 9  |
| Infrared spectroscopy .....     | 10 |

## Structures of ligands

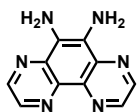

1,4,5,8-tetraazaphenanthrene-9,10-diamine  
"diNH<sub>2</sub>TAP"

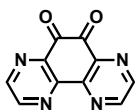

1,4,5,8-tetraazaphenanthrene-9,10-dione  
"TAPdione"

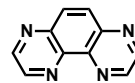

1,4,5,8-tetraazaphenanthrene  
"TAP"

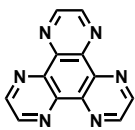

1,4,5,8,9,12-hexaazatriphenylene  
"HAT"

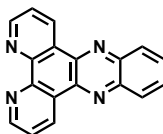

dipyrido[3,2-a:2',3'-c]phenazine  
"DPPZ"

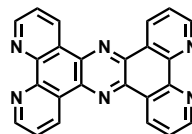

Tetrapyrido[3,2-a:2',3'-c:3'',2''-h:2''',3'''-j]phenazine  
"TPPHZ"

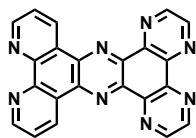

1,10-phenanthroline[5,6-b]1,4,5,8,9,12-hexaazatriphenylene  
"PHEHAT"

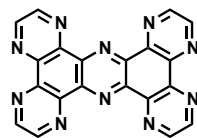

1,4,5,8-tetraazaphenanthrene[9,10-b]1,4,5,8,9,12-hexaazatriphenylene  
"TAPHAT"

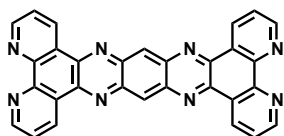

9,11,20,22-tetraazatetrapyrido[3,2-a:2',3'-c:3'',2''-l:2''',3'''-n]-pentacene  
"TATPP"

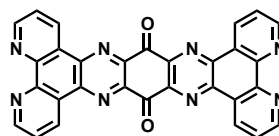

9,11,20,22-tetraazatetrapyrido[3,2-a:2',3'-c:3'',2''-l:2''',3'''-n]-pentacene-10,21-quinone  
"TATPP"

**Figure S1: Structures of the different ligands reported in this study.**

## Mass spectrometry

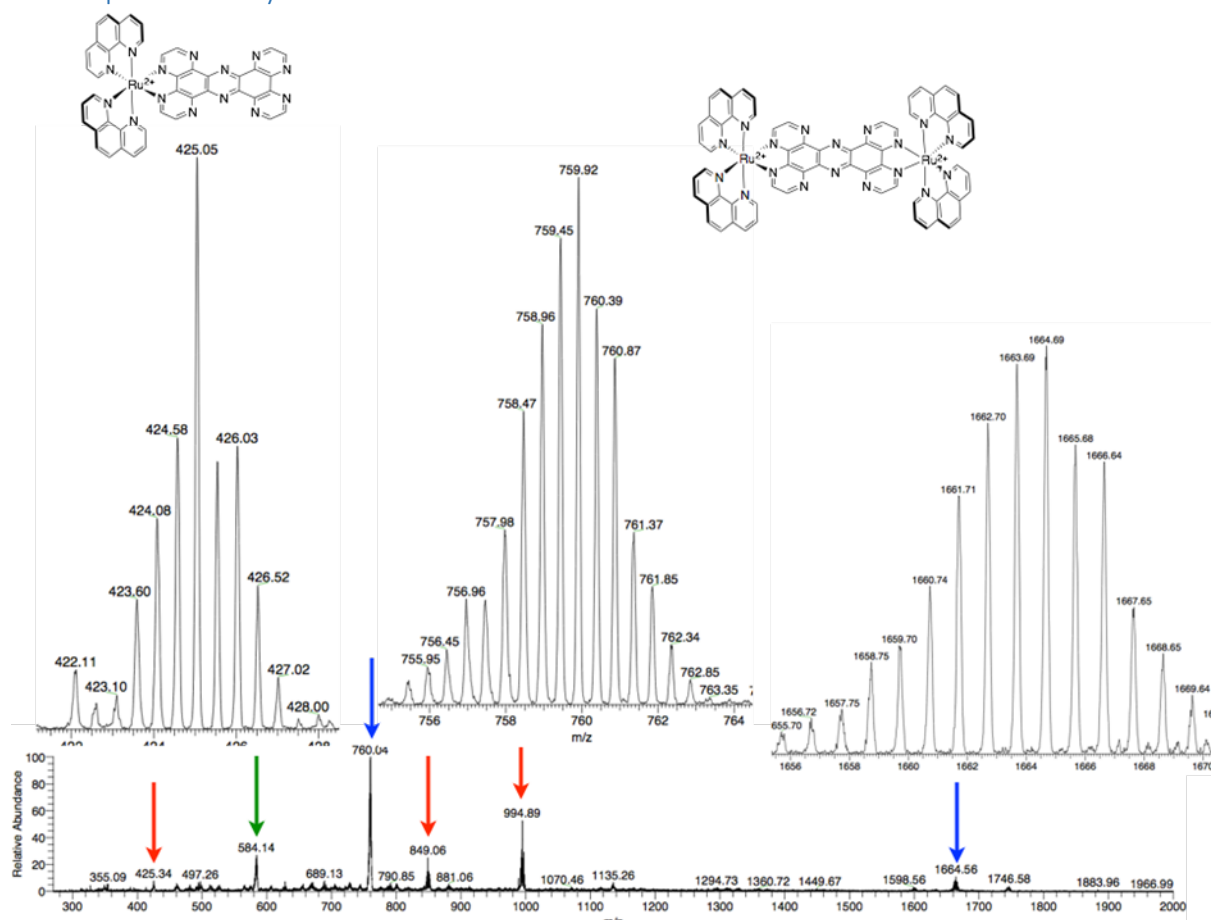

**Figure S2:** ESI-MS spectrum that shows the formation of mono and dinuclear complexes upon reaction between  $[\text{Ru}(\text{phen})_2\text{Cl}_2]$  and TAPHAT. This mixture of products is not obtained when starting from precursor complex  $[\text{Ru}(\text{phen})_2(\text{diNH}_2\text{TAP})]^{2+}$  (see below).

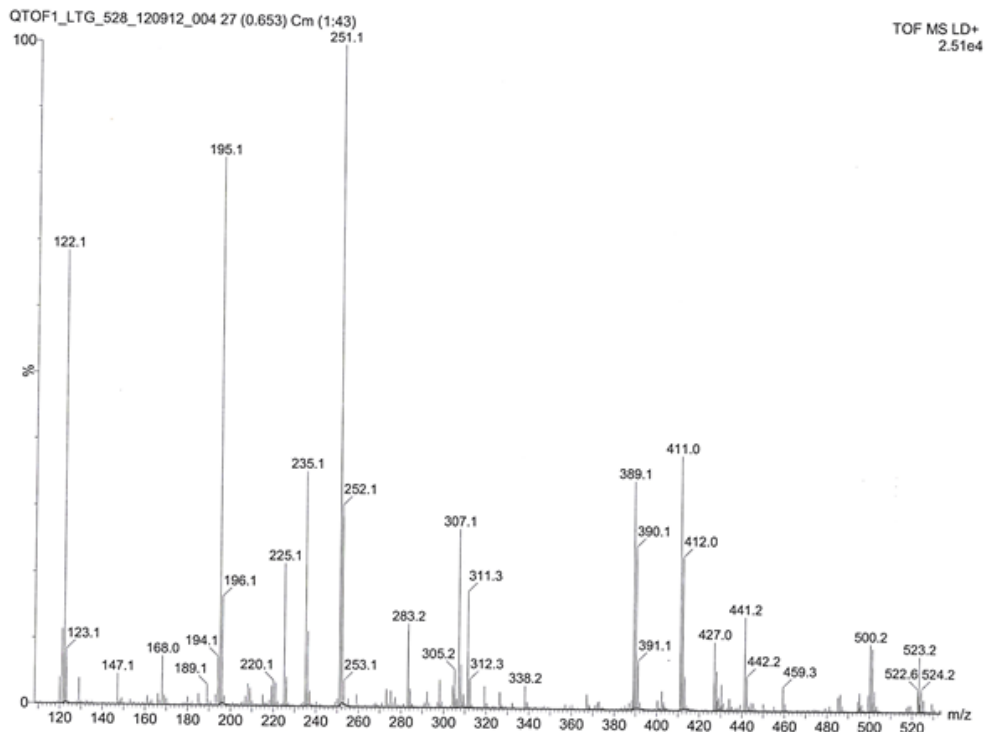

Figure S3: EI-MS spectrum of TAPHAT recorded from THF solutions.

Table S1: Peaks of interest obtained from figure S3. Peaks present at  $m/z = 122.1$ ,  $195.1$  and  $251.1$  have not been taken into consideration as they were already present in the neat solvent used for this study.

| $m/z$ measured | Attribution | $m/z$ calculated | Relative Intensity |
|----------------|-------------|------------------|--------------------|
| 389.1          | $[M+H]^+$   | 389.10           | 34%                |
| 411.0          | $[M+Na]^+$  | 411.08           | 39%                |
| 427.0          | $[M+K]^+$   | 427.06           | 10%                |

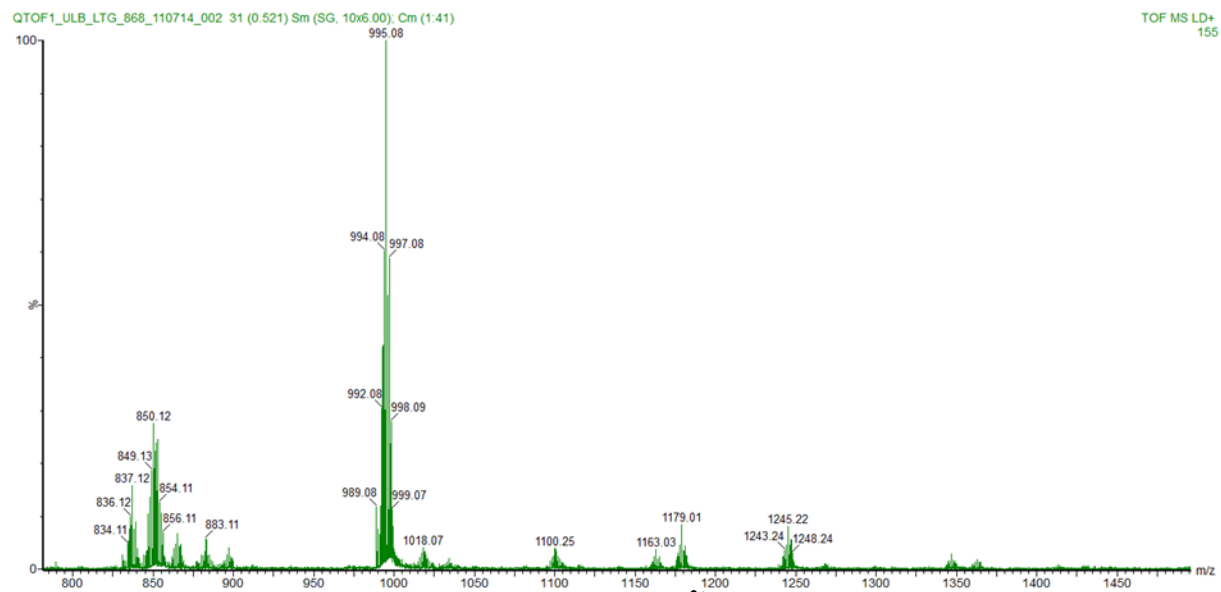

Figure S4: MALDI-MS spectrum of  $[\text{Ru}(\text{phen})_2(\text{TAPHAT})]^{2+} \cdot 2\text{PF}_6^-$

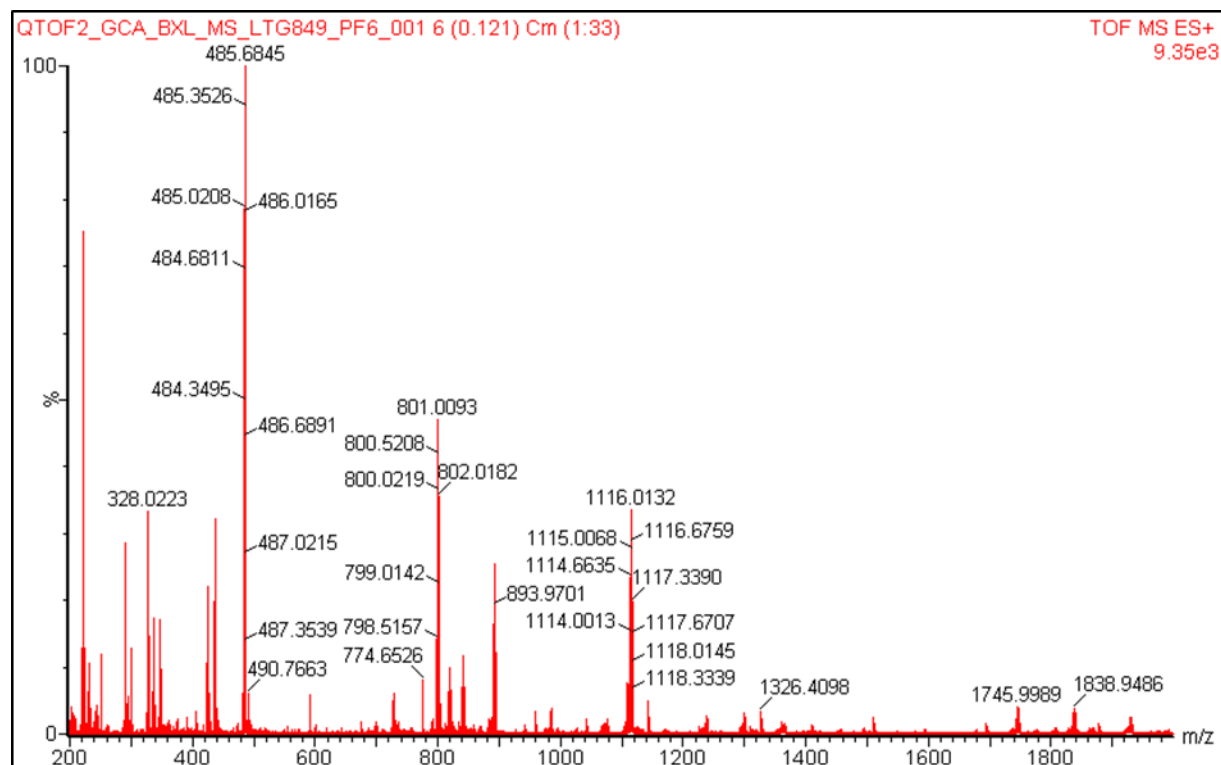

Figure S5: ESI-MS spectrum of  $[\text{Ru}(\text{phen})_2(\text{TAPHAT})\text{Ru}(\text{phen})_2]^{4+} \cdot 4\text{PF}_6^-$

Table 5: Peaks of interest obtained from figure S10.

| m/z measured | Attribution                                              | m/z calculated | Relative Intensity |
|--------------|----------------------------------------------------------|----------------|--------------------|
| 328.02       | $[\text{M}^{4+}]^{4+}$                                   | 328.04         | 35 %               |
| 425.05       | $[\text{M}^{4+} - [\text{Ru}(\text{phen})_2]^{2+}]^{2+}$ | 425.07         | 22 %               |
| 437.03       | $[\text{M}^{4+} - \text{H}^+]^{3+}$                      | 437.06         | 32 %               |
| 485.68       | $[\text{M}^{4+} + \text{PF}_6^-]^{3+}$                   | 485.38         | 100 %              |
| 801.01       | $[\text{M}^{4+} + 2\text{PF}_6^-]^{2+}$                  | 801.05         | 48 %               |
| 893.97       | $[\text{M}^{4+} + 3\text{PF}_6^- + \text{K}^+]^{2+}$     | 893.52         | 26 %               |
| 1116.01      | $[2\text{M}^{4+} + 5\text{PF}_6^-]^{3+}$                 | 1116.06        | 34 %               |
| 1746.00      | $[2\text{M}^{4+} + 6\text{PF}_6^-]^{2+}$                 | 1746.57        | 6 %                |
| 1838.95      | $[2\text{M}^{4+} + 7\text{PF}_6^- + \text{K}^+]^{2+}$    | 1838.53        | 6 %                |
| 1929.92      | $[2\text{M}^{4+} + 8\text{PF}_6^- + 2\text{K}^+]^{2+}$   | 1930.50        | 4 %                |

NMR spectroscopy

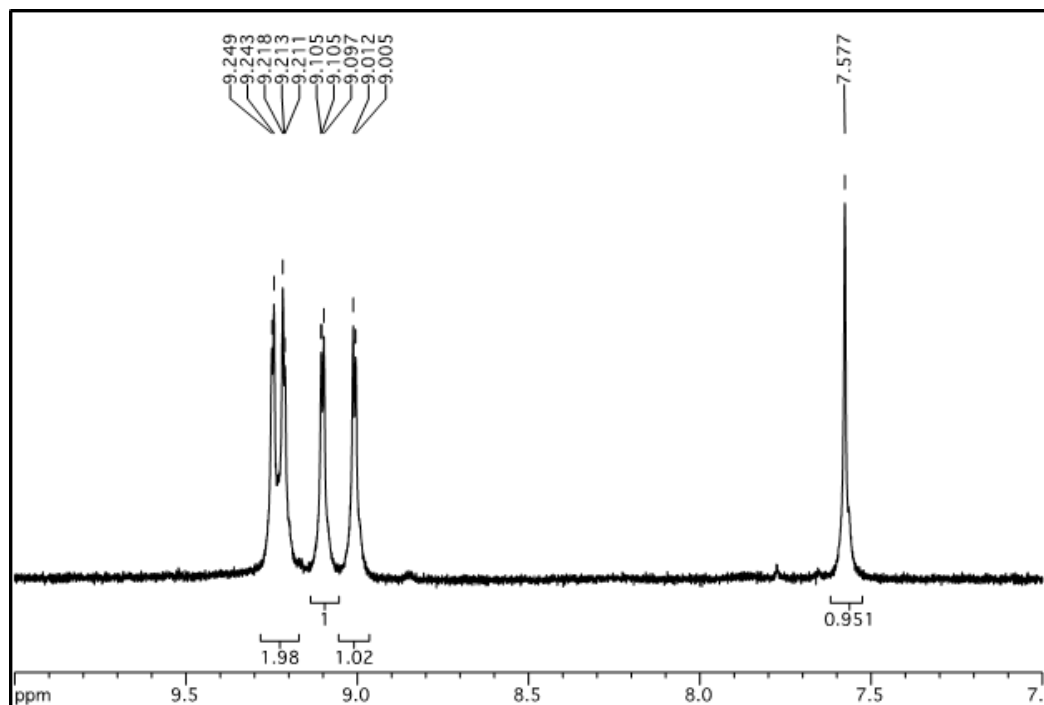

Figure S6:  $^1\text{H}$  NMR of 9-hydroxy-1,4,5,8-tetraazaphenanthrene recorded in  $\text{CD}_3\text{OD}$  at 300MHz

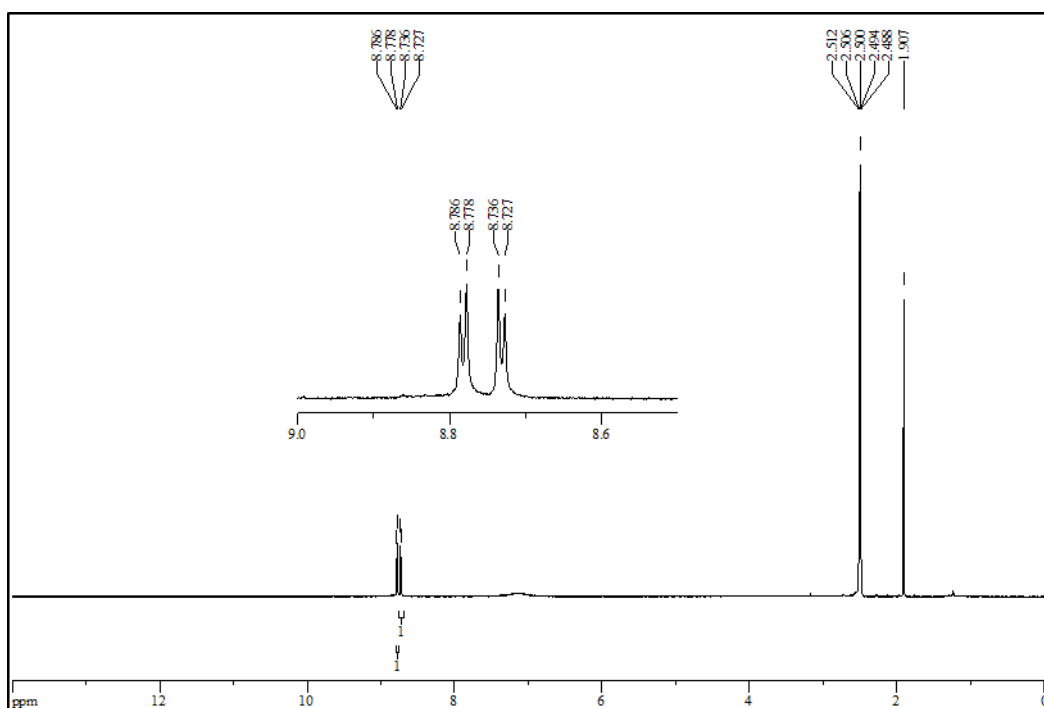

Figure S7:  $^1\text{H}$  NMR of 1,4,5,8-tetraazaphenanthrene-9,10-dione recorded in  $\text{DMSO}-d_6$  at 300MHz

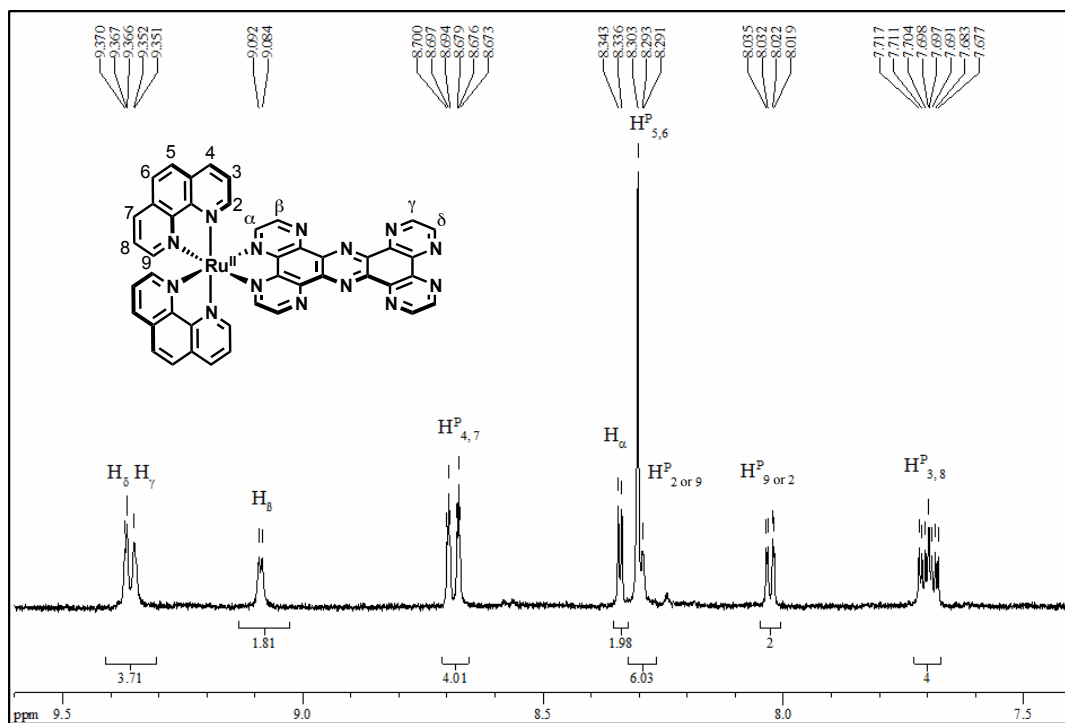

Figure S8:  $^1\text{H}$  NMR of  $[\text{Ru}(\text{phen})_2(\text{TAPHAT})]^{2+} \cdot 2\text{PF}_6^-$  recorded in  $\text{CD}_3\text{CN}$  at 300MHz

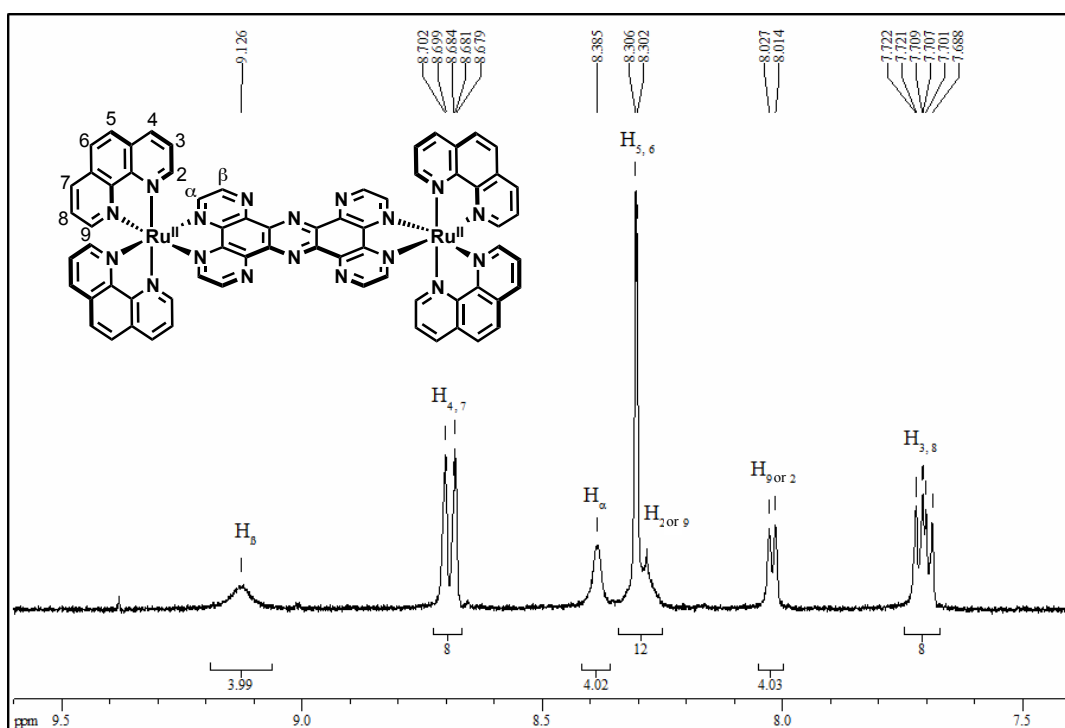

Figure S2:  $^1\text{H}$  NMR of  $[\text{Ru}(\text{phen})_2(\text{TAPHAT})\text{Ru}(\text{phen})_2]^{4+} \cdot 4\text{PF}_6^-$  recorded in  $\text{CD}_3\text{CN}$  at 300MHz



## Photostability measurement

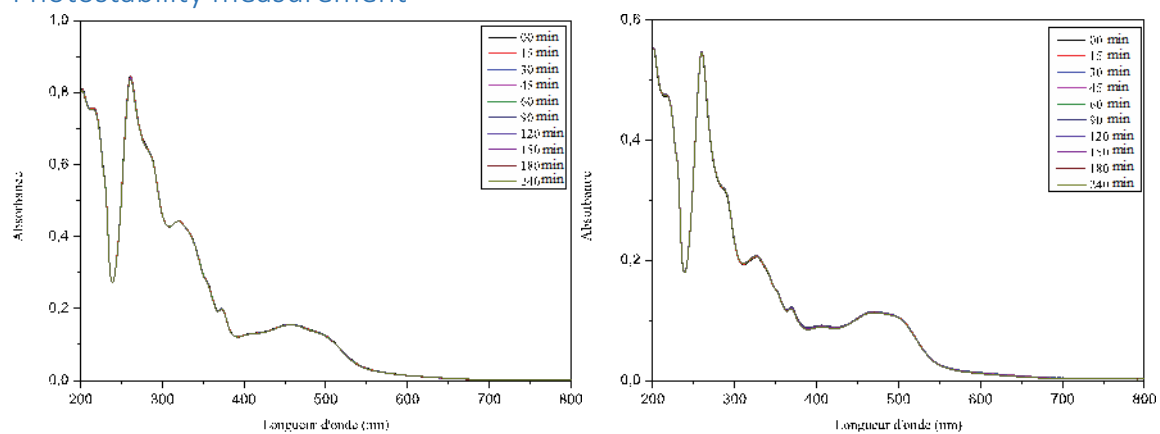

**Figure S10: Photostability of  $[\text{Ru}(\text{phen})_2(\text{TAPHAT})]^{2+} \cdot 2\text{PF}_6^-$  (left) and  $[\text{Ru}(\text{phen})_2(\text{TAPHAT})\text{Ru}(\text{phen})_2]^{4+} \cdot 4\text{PF}_6^-$  (right) under light irradiation (Xe, 200W) in acetonitrile and at room temperature**

Infrared spectroscopy

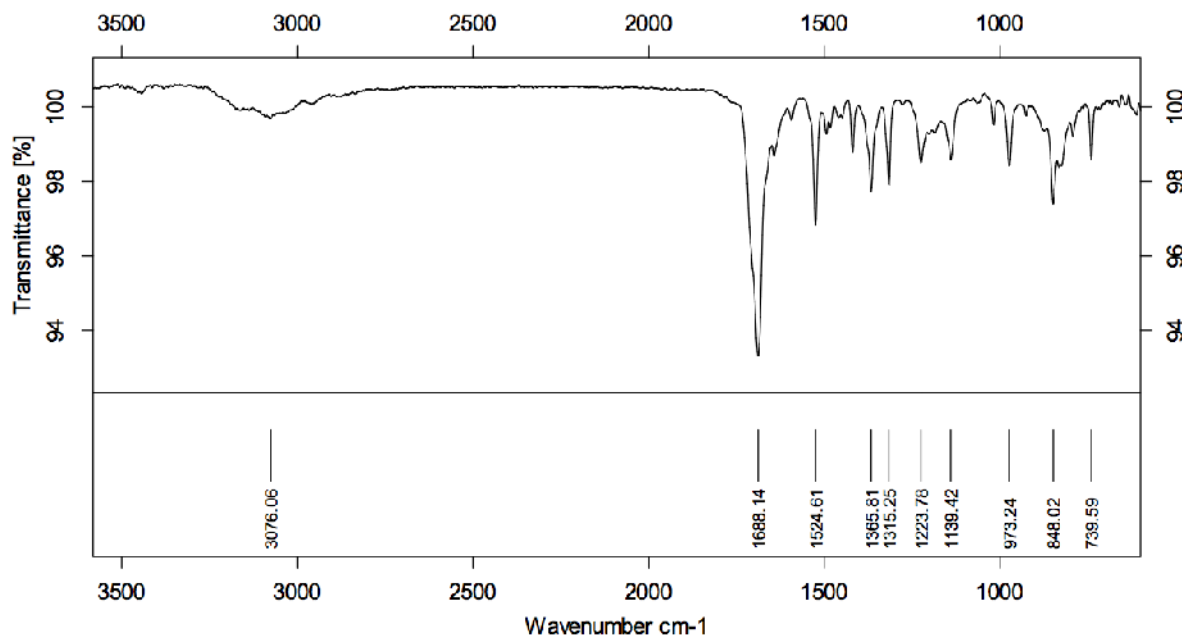

Figure S11: IR spectrum of 1,4,5,8-tetraazaphenanthrene-9,10-dione
